# Supplementary material for: Impact of service line replacement on lead, cadmium, and other drinking water quality parameters in Flint, Michigan
Source: Royal Society of Chemistry journal article supplement (doi:10.1039/d0ew00975j), 2021-01-01
Supplement: d0ew00975j1.xlsx [file d0ew00975j1.xlsx]

## Sheet: Sheet1
Table S10. Metals concentrations in samples from individual homes.
House ID	Visit	Sample Type	Temp	Cl2 (Total)	Cl2 (Free)	pH	Al		P		Cr		Mn		Fe		Ni		Cu		Zn		Cd		Pb
							Total	Dissolved	Total	Dissolved	Total	Dissolved	Total	Dissolved	Total	Dissolved	Total	Dissolved	Total	Dissolved	Total	Dissolved	Total	Dissolved	Total	Dissolved
			(∘C)	(mg/L)	(mg/L)		(𝛍g/L)	(𝛍g/L)	(𝛍g/L)	(𝛍g/L)	(𝛍g/L)	(𝛍g/L)	(𝛍g/L)	(𝛍g/L)	(𝛍g/L)	(𝛍g/L)	(𝛍g/L)	(𝛍g/L)	(𝛍g/L)	(𝛍g/L)	(𝛍g/L)	(𝛍g/L)	(𝛍g/L)	(𝛍g/L)	(𝛍g/L)	(𝛍g/L)
S01	Pre	F1	NA	NA	NA	NA	Below MDL	9	860	740	Below LOQ	Below LOQ	8.9	7.7	160	1.3	0.78	0.79	39	26	Below LOQ	Below LOQ	0.65	0.65	11	0.31
		PP	21.5	0.3	0.05	7.13	Below MDL	9	990	800	Below LOQ	Below LOQ	7.5	5.7	140	1.2	0.9	0.84	30	20	Below LOQ	Below LOQ	0.63	0.56	9.2	Below LOQ
		DS	8.3	0.7	0.25	7.22	9	Below MDL	Below MDL	Below MDL	Below LOQ	Below LOQ	3.6	1.2	150	3.9	Below LOQ	Below LOQ	5.1	3.2	Below LOQ	Below LOQ	0.16	Below LOQ	4.1	Below LOQ
		Hot	39.4	0.05	0.01	7.37	65	9	Below LOQ	Below LOQ	Below LOQ	Below LOQ	4.3	3.7	65	3.6	0.95	0.83	13	6.7	Below LOQ	Below LOQ	0.25	0.16	2.8	Below LOQ
	2wk	F1	NA	NA	NA	NA	Below MDL	9	Below LOQ	Below LOQ	3.8	0.31	14	13	200	3.8	3.8	1.7	79	58	Below LOQ	Below LOQ	0.76	0.68	15	0.65
		PP	15.4	0.05	0.01	6.86	Below MDL	9	880	860	0.45	2.2	8.2	7.7	130	20	0.87	2.3	160	130	Below LOQ	Below LOQ	0.41	0.38	6.6	0.95
		DS	7.8	0.5	0.14	7.2	9	9	Below MDL	960	1.3	2.8	4.1	2.4	110	14	1.3	2.4	24	24	Below LOQ	Below LOQ	Below LOQ	Below LOQ	0.61	0.25
		Hot	47.3	0.05	0.01	7.29	82	43	Below LOQ	Below LOQ	2.9	0.97	5.9	5	97	8.1	2	1.3	31	30	Below LOQ	Below LOQ	0.16	Below LOQ	2.9	0.36
	5wk	F1	NA	NA	NA	NA	38	67	900	Below LOQ	Below LOQ	0.22	11	4.4	430	6.1	0.76	Below LOQ	92	27	Below LOQ	Below LOQ	0.85	Below LOQ	74	0.25
		PP	24.8	0.1	0.01	7.13	31	9	Below MDL	910	Below LOQ	Below LOQ	8.3	5.9	310	3.9	Below LOQ	Below LOQ	100	64	Below LOQ	Below LOQ	0.53	0.49	36	0.28
		DS	10.5	0.3	0.18	7.31	Below MDL	9	Below MDL	Below MDL	Below LOQ	0.22	4	2	110	12	Below LOQ	Below LOQ	25	24	Below LOQ	Below LOQ	Below LOQ	Below LOQ	0.57	0.28
		Hot	46.8	0.05	0.01	7.24	99	69	700	Below LOQ	Below LOQ	Below LOQ	4.7	4.4	72	2.6	Below LOQ	Below LOQ	38	26	Below LOQ	Below LOQ	Below LOQ	Below LOQ	1.9	Below LOQ
S02	Pre	F1	NA	NA	NA	NA	32	Below MDL	830	710	Below LOQ	Below LOQ	8.4	6.5	200	Below LOQ	0.74	0.76	20	10	Below LOQ	Below LOQ	4.7	4.2	4	Below LOQ
		PP	21.1	0.05	0.01	6.95	47	9	960	730	Below LOQ	Below LOQ	10	8.2	480	2.2	Below LOQ	0.78	20	7.6	900	750	3.3	2.7	4	Below LOQ
		DS	12.5	0.8	0.65	7.24	36	Below MDL	Below MDL	Below MDL	Below LOQ	Below LOQ	1.9	0.61	51	7.2	Below LOQ	0.7	4.5	6.1	Below LOQ	Below LOQ	0.4	0.58	1.6	0.21
		Hot	54.7	0.05	0.01	7.2	Below MDL	Below MDL	Below MDL	Below MDL	0.16	0.19	1.1	0.65	33	Below LOQ	0.82	0.73	48	34	Below LOQ	Below LOQ	0.35	0.4	1.2	Below LOQ
	2wk	F1	NA	NA	NA	NA	Below MDL	Below MDL	850	790	Below MDL	Below MDL	6	4.5	150	1.7	Below LOQ	Below LOQ	22	14	940	910	3.8	3.8	2.6	Below MDL
		PP	21.4	0.05	0.01	7.41	36	Below MDL	Below MDL	760	Below LOQ	Below MDL	8.2	6.2	440	6.8	Below LOQ	Below LOQ	26	10	810	650	3.2	2.5	2.8	Below MDL
		DS	8.5	0.7	0.79	7.04	9	Below MDL	Below MDL	Below MDL	Below MDL	Below MDL	1.1	0.16	33	9.1	Below MDL	Below LOQ	32	29	92	99	Below LOQ	Below LOQ	Below LOQ	Below MDL
		Hot	55	0.05	0.01	7.12	Below MDL	Below MDL	Below MDL	Below MDL	Below LOQ	Below LOQ	0.82	0.83	25	24	Below LOQ	Below LOQ	76	74	78	73	Below MDL	Below MDL	0.52	0.54
	5wk	F1	NA	NA	NA	NA	47	9	860	810	Below LOQ	Below LOQ	8.4	6.7	250	5	Below LOQ	Below LOQ	37	21	Below LOQ	Below LOQ	4.9	4.5	3.6	Below MDL
		PP	23.7	0.05	0.01	7.03	63	9	Below MDL	860	Below LOQ	0.23	9.8	8.5	470	5	Below LOQ	0.76	33	14	910	850	3.3	3.1	2.9	Below MDL
		DS	10.2	0.8	0.59	7.17	Below MDL	9	Below MDL	Below MDL	0.78	0.42	1.8	0.71	66	11	1.5	0.84	24	17	Below LOQ	Below LOQ	0.73	0.81	0.6	Below LOQ
		Hot	56.2	0.05	0.01	7.03	34	Below MDL	Below MDL	Below MDL	0.24	0.43	1.5	1.2	50	4.8	Below LOQ	1.1	90	55	93	79	0.34	0.91	0.89	Below LOQ
S04	Pre	F1	NA	NA	NA	NA	Below MDL	9	Below MDL	Below MDL	Below LOQ	Below LOQ	0.5	0.27	22	2.6	1.7	1.4	51	43	Below LOQ	Below LOQ	0.51	0.45	2.5	0.38
		PP	22	0.4	0.09	6.95	9	9	Below MDL	Below MDL	Below LOQ	Below LOQ	0.53	0.32	54	3.6	1	0.99	42	37	Below LOQ	Below LOQ	0.62	0.63	2.9	0.33
		DS	6.8	0.9	0.66	7.06	Below MDL	Below MDL	Below MDL	Below MDL	Below LOQ	0.17	1.6	0.95	20	7.1	Below LOQ	Below LOQ	4.7	4.3	Below LOQ	Below LOQ	0.15	0.17	1.2	0.29
		Hot	50.4	0.1	0.01	7.26	33	Below MDL	Below MDL	Below MDL	Below LOQ	Below LOQ	3.4	1.4	95	1.7	0.95	0.92	35	17	Below LOQ	91	0.37	0.33	6.1	Below LOQ
	2wk	F1	NA	NA	NA	NA	Below MDL	9	Below MDL	Below MDL	Below MDL	Below LOQ	Below MDL	0.77	Below MDL	5.7	Below MDL	0.96	Below MDL	55	Below MDL	81	Below MDL	Below LOQ	Below MDL	0.64
		PP	15.8	1	0.76	6.96	40	9	Below MDL	Below MDL	Below LOQ	0.23	1.3	0.75	24	5.8	Below LOQ	Below LOQ	42	35	Below LOQ	Below LOQ	Below MDL	Below MDL	2.2	0.27
		DS	8.3	1.2	0.85	7.21	37	9	Below MDL	Below MDL	Below LOQ	0.18	1.4	1	19	5.6	Below LOQ	Below LOQ	20	21	9.9	Below LOQ	Below MDL	Below MDL	0.38	Below LOQ
		Hot	48.8	0.1	0.01	7.08	39	31	Below MDL	Below MDL	0.17	Below LOQ	1.8	1.2	39	5.2	Below LOQ	Below LOQ	42	34	Below LOQ	Below LOQ	Below LOQ	Below LOQ	1.8	Below LOQ
	5wk	F1	NA	NA	NA	NA	Below MDL	9	Below MDL	Below MDL	0.17	0.18	0.78	0.31	17	2.4	Below LOQ	Below LOQ	78	71	66	68	Below MDL	Below LOQ	1.8	0.41
		PP	19.5	0.8	0.44	7.07	Below MDL	9	Below MDL	Below MDL	0.21	Below LOQ	0.85	0.5	15	3.6	Below LOQ	Below LOQ	100	100	Below LOQ	Below LOQ	Below MDL	Below MDL	1.6	0.5
		DS	10.2	0.8	0.65	7.25	9	9	Below MDL	Below MDL	Below LOQ	0.41	1.5	1.2	12	7.9	Below LOQ	0.78	15	16	Below LOQ	Below LOQ	Below MDL	Below MDL	0.79	0.48
		Hot	50.5	0.05	0.01	7.19	Below MDL	Below MDL	Below MDL	Below MDL	0.16	0.44	1.9	0.86	39	4.6	0.84	1.4	53	39	Below LOQ	Below LOQ	Below LOQ	Below LOQ	2.2	0.22
S05	Pre	F1	NA	NA	NA	NA	9	Below MDL	790	760	Below LOQ	Below LOQ	11	11	130	1.7	2.4	2.3	220	180	Below LOQ	Below LOQ	Below MDL	Below MDL	20	1.3
		PP	18.3	0.2	0.01	7.15	9	Below MDL	860	810	Below LOQ	Below LOQ	12	11	150	2.1	3.5	1.6	200	160	94	67	Below MDL	Below MDL	19	1.2
		DS	10.2	0.1	0.01	7.39	9	Below MDL	970	830	0.42	1	13	12	200	9.1	0.97	1	24	27	8.1	8.8	Below LOQ	Below LOQ	3.2	0.69
		Hot	37.5	0.05	0.01	7.31	9	9	780	780	Below LOQ	Below LOQ	11	11	180	4.2	0.97	1	100	59	Below LOQ	Below LOQ	Below MDL	Below MDL	24	0.73
	2wk	F1	NA	NA	NA	NA	9	9	760	750	1.3	2.8	15	16	100	7	3.4	6.4	260	230	Below LOQ	Below LOQ	Below MDL	Below MDL	11	1.2
		PP	16.9	0.1	0.01	7.44	9	Below MDL	820	760	Below LOQ	0.25	16	16	160	4.7	1.9	1.9	250	200	71	68	Below MDL	Below MDL	14	1.1
		DS	10.3	0.2	0.01	7.37	470	9	Below LOQ	820	1.4	0.96	29	9.6	3100	25	1.9	1.5	60	24	8.2	9.5	Below MDL	Below MDL	1.5	0.47
		Hot	40	0.05	0.06	7.7	72	Below MDL	930	690	1.2	1.3	14	11	680	12	2.2	2.6	170	27	Below LOQ	Below LOQ	Below MDL	Below MDL	45	0.28
	5wk	F1	NA	NA	NA	NA	9	9	Below MDL	Below MDL	Below LOQ	Below LOQ	5.5	4.5	87	2.5	1.9	2.1	240	230	93	Below LOQ	Below MDL	Below MDL	10	1.2
		PP	18.7	0.05	0.01	7.33	9	9	980	Below MDL	0.19	Below LOQ	5.6	3.8	94	2.1	1.4	1.2	210	180	Below LOQ	Below LOQ	Below MDL	Below MDL	11	0.91
		DS	11.5	0.2	0.05	7.31	Below MDL	9	Below MDL	970	0.16	0.18	5.3	3.1	130	3.9	0.8	0.97	190	150	Below LOQ	Below LOQ	Below MDL	Below MDL	2.2	0.43
		Hot	38.2	0.05	0.01	7.51	Below MDL	9	950	880	Below LOQ	Below LOQ	8.2	6.9	170	3.7	0.8	0.91	150	79	Below LOQ	Below LOQ	Below MDL	Below MDL	18	0.38
S06	Pre	F1	NA	NA	NA	NA	Below MDL	Below MDL	Below MDL	Below MDL	0.16	Below LOQ	3.1	0.23	87	2.8	1.7	1.5	42	29	96	83	Below MDL	Below MDL	9.4	0.61
		PP	16.8	0.8	0.52	6.88	Below MDL	Below MDL	Below MDL	980	0.61	0.26	2.3	0.14	62	4.2	1.2	1.1	38	29	Below LOQ	Below LOQ	Below MDL	Below MDL	8.2	0.99
		DS	8.6	1.1	0.72	7.26	9	Below MDL	Below MDL	Below MDL	Below LOQ	Below LOQ	1.3	0.93	16	4.8	Below LOQ	Below LOQ	3.7	5.2	Below LOQ	Below LOQ	Below MDL	Below MDL	1.3	0.72
		Hot	48.6	0.1	0.01	7.16	Below MDL	Below MDL	Below MDL	Below MDL	0.38	0.23	8.2	0.55	130	1.7	0.86	0.75	35	19	Below LOQ	Below LOQ	Below MDL	Below MDL	15	0.34
	2wk	F1	NA	NA	NA	NA	9	Below MDL	Below MDL	Below MDL	Below LOQ	0.17	1.3	0.83	21	3.8	Below LOQ	Below LOQ	51	43	Below LOQ	Below LOQ	Below MDL	Below MDL	0.86	0.22
		PP	15.4	0.7	0.62	7.14	9	Below MDL	Below MDL	Below MDL	0.62	Below LOQ	1.3	1	21	6.3	0.97	Below LOQ	40	36	Below LOQ	Below LOQ	Below MDL	Below MDL	0.56	0.22
		DS	7.9	0.8	0.6	7.22	9	Below MDL	Below MDL	Below MDL	Below LOQ	Below LOQ	1.6	1.2	20	9.2	Below LOQ	Below LOQ	14	13	Below MDL	Below LOQ	Below MDL	Below MDL	1.3	Below MDL
		Hot	52	0.05	0.02	7.17	30	Below MDL	Below MDL	Below MDL	0.21	Below LOQ	3.8	0.77	55	1.5	Below LOQ	Below LOQ	39	29	Below LOQ	Below LOQ	Below MDL	Below MDL	6.2	0.17
	5wk	F1	NA	NA	NA	NA	9	Below MDL	Below MDL	Below MDL	Below LOQ	Below LOQ	1.5	0.73	26	1.1	0.81	0.75	180	160	Below LOQ	Below LOQ	Below MDL	Below MDL	2.7	0.58
		PP	17.9	0.5	0.26	6.99	9	Below MDL	Below MDL	Below MDL	Below LOQ	0.17	0.94	0.42	21	2.3	Below LOQ	Below LOQ	130	120	67	69	Below MDL	Below MDL	1.9	0.51
		DS	9.9	0.9	0.63	7.22	9	Below MDL	Below MDL	Below MDL	0.24	0.2	1.5	1.1	21	8.9	Below LOQ	Below LOQ	16	18	Below LOQ	Below LOQ	Below MDL	Below MDL	Below LOQ	0.25
		Hot	50.3	0.05	0.01	7.07	31	Below MDL	Below MDL	Below MDL	Below LOQ	0.3	5.3	0.91	75	5.4	Below LOQ	Below LOQ	45	30	Below LOQ	Below LOQ	Below MDL	Below MDL	8.4	0.26
S07	Pre	F1	NA	NA	NA	NA	9	Below MDL	Below LOQ	Below MDL	Below LOQ	Below MDL	11	Below MDL	120	Below MDL	Below LOQ	Below MDL	4.3	Below MDL	Below LOQ	Below MDL	6.5	Below MDL	4.1	Below MDL
		PP	24.2	0.05	0.01	6.97	9	Below MDL	Below LOQ	Below LOQ	Below LOQ	0.18	8.2	8.2	120	4.2	Below LOQ	0.71	3.5	2.5	840	850	4	4	2.8	Below LOQ
		DS	7.5	0.05	0.01	7.16	9	Below MDL	Below MDL	Below MDL	Below LOQ	0.37	2.7	1.3	67	6.6	Below LOQ	Below LOQ	0.91	0.64	Below LOQ	Below LOQ	0.41	0.51	2.7	Below LOQ
		Hot	48.53	0.1	0.01	7.16	36	Below MDL	Below MDL	Below MDL	0.26	Below LOQ	6.2	1.4	270	4.4	0.76	Below LOQ	11	2.7	Below LOQ	93	0.38	0.45	5.6	Below LOQ
	2wk	F1	NA	NA	NA	NA	46	Below MDL	Below LOQ	Below MDL	Below LOQ	Below MDL	12	Below MDL	320	Below MDL	0.72	Below MDL	16	Below MDL	Below LOQ	Below MDL	6.7	Below MDL	8.7	Below MDL
		PP	24	0.2	0.02	7.8	36	9	720	Below LOQ	Below LOQ	0.2	8.8	7.6	260	5.3	Below LOQ	0.76	13	5.5	970	870	4.5	3.8	6.4	Below LOQ
		DS	9.9	0.8	0.65	7.1	Below MDL	9	Below MDL	Below MDL	0.3	0.27	3.5	1.7	68	7.1	Below LOQ	Below LOQ	22	18	Below LOQ	Below LOQ	0.45	0.41	Below LOQ	Below MDL
		Hot	47.9	0.1	0.01	7.25	46	Below MDL	Below MDL	Below MDL	0.22	0.17	7.3	2.1	440	4	Below LOQ	Below LOQ	38	10	Below LOQ	94	0.45	0.43	7.6	Below LOQ
	5wk	F1	NA	NA	NA	NA	9	Below MDL	Below LOQ	Below LOQ	0.3	0.32	12	12	400	4.6	1	0.95	12	4.9	Below LOQ	Below LOQ	7.4	6.7	7.4	Below LOQ
		PP	20.2	0.3	0.03	7.21	9	Below MDL	750	Below LOQ	0.18	Below LOQ	8.6	6.7	290	5	Below LOQ	Below LOQ	12	5.2	Below LOQ	920	4.2	3.8	5.5	Below LOQ
		DS	9.8	0.7	0.54	7.31	9	Below MDL	Below MDL	Below MDL	Below LOQ	0.2	3	1.5	64	15	Below LOQ	Below LOQ	11	8.6	Below LOQ	Below LOQ	0.46	0.53	0.3	0.17
		Hot	47.2	0.05	0.01	7.33	Below MDL	Below MDL	Below MDL	Below MDL	0.19	0.17	3.4	2.3	81	2.9	Below LOQ	Below LOQ	24	12	68	60	0.17	0.31	1.1	Below LOQ
S08	Pre	F1	NA	NA	NA	NA	9	Below MDL	Below MDL	960	Below LOQ	0.23	6	5.1	40	1.5	0.92	1	120	110	77	77	Below MDL	Below MDL	2.5	0.23
		PP	25	0.05	0.01	7.28	9	9	Below MDL	Below MDL	0.25	0.34	6.7	5	68	2.8	0.79	1.2	93	84	Below LOQ	Below LOQ	Below MDL	Below MDL	3.2	Below LOQ
		DS	12.5	0.4	0.25	7.15	9	Below MDL	Below MDL	Below MDL	0.18	0.27	4.9	3.7	73	4.8	Below LOQ	Below LOQ	8.6	11	Below MDL	Below MDL	Below MDL	Below MDL	2.4	Below LOQ
		Hot	47.8	0.1	0.01	7.25	Below MDL	Below MDL	Below MDL	9	Below LOQ	Below LOQ	6.2	0.27	73	14	Below LOQ	Below MDL	27	1.5	Below LOQ	Below MDL	Below MDL	Below MDL	2.9	0.44
	2wk	F1	NA	NA	NA	NA	88	9	Below MDL	Below MDL	0.48	0.32	2	0.86	110	4.4	1.2	1.2	120	87	Below LOQ	Below LOQ	Below MDL	Below MDL	33	3
		PP	16.7	0.5	0.23	7.2	50	9	Below MDL	Below MDL	0.25	0.22	2	0.61	120	4.5	Below LOQ	0.79	91	66	70	62	Below MDL	Below MDL	19	1.2
		DS	10.1	0.7	0.46	7.24	9	9	Below MDL	Below MDL	0.19	0.39	2	1.1	75	9.1	Below LOQ	0.76	19	22	Below LOQ	Below LOQ	Below MDL	Below MDL	0.85	1.2
		Hot	42.8	0.1	0.01	7.2	30	Below MDL	Below MDL	960	Below LOQ	Below LOQ	8.2	5.5	120	5.2	Below LOQ	Below LOQ	49	30	Below LOQ	Below LOQ	Below MDL	Below MDL	1.9	0.71
	5wk	F1	NA	NA	NA	NA	9	Below MDL	Below MDL	Below MDL	0.29	0.17	1.4	0.53	56	3.2	0.86	0.8	100	81	Below LOQ	94	Below MDL	Below MDL	14	3.1
		PP	16.9	0.4	0.21	7.14	Below MDL	Below MDL	Below MDL	Below MDL	0.49	0.27	1.8	0.65	93	6.9	Below LOQ	Below LOQ	69	62	Below LOQ	Below LOQ	Below MDL	Below MDL	6.4	1.5
		DS	11.6	0.6	0.39	7.33	Below MDL	Below MDL	Below MDL	Below MDL	Below LOQ	0.3	2.8	1.7	82	7.2	Below LOQ	Below LOQ	21	14	6.6	7.5	Below MDL	Below MDL	2.6	0.63
		Hot	47.2	0.1	0.01	7.24	Below MDL	Below MDL	Below MDL	Below MDL	0.26	Below LOQ	4.8	1.5	72	3.1	Below LOQ	Below LOQ	37	24	Below LOQ	Below LOQ	Below MDL	Below MDL	1.4	0.36
S09	Pre	F1	NA	NA	NA	NA	9	9	850	760	Below LOQ	Below LOQ	15	14	430	4.5	4.3	4.4	120	76	Below LOQ	Below LOQ	0.49	0.44	2.6	Below LOQ
		PP	22.9	0.2	0.02	7.14	Below MDL	9	950	830	0.51	Below LOQ	9.6	8.4	410	7.5	2.3	1.9	53	35	Below LOQ	Below LOQ	0.28	0.27	2.7	Below LOQ
		DS	7.2	1.2	0.74	7.12	Below MDL	Below MDL	Below MDL	Below MDL	0.19	0.16	1.6	0.91	73	13	Below LOQ	Below LOQ	9.1	13	Below LOQ	Below LOQ	Below LOQ	Below LOQ	0.98	Below LOQ
		Hot	54	0.1	0.01	7.43	Below MDL	Below MDL	860	940	0.29	0.21	3.9	1.7	87	3.1	1.6	1.2	37	18	Below LOQ	Below LOQ	Below MDL	Below MDL	1.4	Below MDL
	2wk	F1	NA	NA	NA	NA	Below MDL	9	Below MDL	920	Below LOQ	Below LOQ	12	11	290	8	2.2	1.8	120	75	Below LOQ	Below LOQ	0.54	0.45	0.65	Below MDL
		PP	24.5	0.1	0.04	7.04	31	Below MDL	Below MDL	Below MDL	Below LOQ	Below LOQ	8.7	7.7	650	15	1.1	1.2	96	41	Below LOQ	Below LOQ	0.32	0.24	1.5	Below MDL
		DS	8.5	0.9	0.76	7.06	52	9	Below MDL	Below MDL	Below LOQ	0.17	1.6	0.9	43	7.6	Below LOQ	Below LOQ	22	19	Below LOQ	Below LOQ	Below LOQ	Below MDL	Below LOQ	Below MDL
		Hot	57.2	0.05	0.01	7.11	42	35	Below MDL	Below MDL	0.19	0.19	3.3	1.6	72	6.1	1.1	0.92	34	27	Below LOQ	Below LOQ	Below MDL	Below LOQ	0.61	Below MDL
	5wk	F1	NA	NA	NA	NA	Below MDL	9	Below MDL	930	0.2	0.17	9.4	8.7	360	6.5	3.1	3.2	110	72	Below LOQ	Below LOQ	0.43	0.35	0.7	Below MDL
		PP	22.4	0.2	0.1	7.06	Below MDL	9	Below MDL	990	0.21	0.25	7.1	5.7	310	7	1.6	1.6	71	49	Below LOQ	Below LOQ	0.27	0.24	0.68	Below MDL
		DS	9.5	0.9	0.74	7.21	Below MDL	9	Below MDL	Below MDL	0.43	0.2	1.3	0.92	32	6.6	0.83	Below LOQ	17	14	Below LOQ	Below LOQ	Below MDL	Below MDL	Below LOQ	Below MDL
		Hot	54.2	0.05	0.01	7.25	30	Below MDL	Below MDL	960	0.19	0.24	2.5	1.5	45	2.3	1.2	1.3	31	21	Below LOQ	Below LOQ	Below MDL	Below MDL	0.28	Below MDL
S10	Pre	F1	NA	NA	NA	NA	9	Below MDL	Below LOQ	Below LOQ	0.24	Below LOQ	16	13	270	2.2	1.4	1.3	31	17	Below LOQ	Below LOQ	4.7	3.9	8.9	0.2
		PP	15.2	0.2	0.01	7.19	9	Below MDL	Below LOQ	Below LOQ	Below LOQ	1.1	10	8.9	240	6.3	1.1	1.5	44	29	650	630	2.3	2.4	9.1	0.24
		DS	8.2	0.5	0.28	7.33	9	Below MDL	Below MDL	890	Below LOQ	0.23	7.4	4.7	210	12	Below LOQ	Below LOQ	12	10	84	91	0.39	0.46	2.7	0.24
		Hot	60	0.05	0.02	8.09	57	38	Below MDL	86	0.21	Below MDL	37	23	260	5.5	5.7	2.1	21	7.7	Below LOQ	Below LOQ	0.3	Below LOQ	4.2	Below LOQ
	2wk	F1	NA	NA	NA	NA	9	9	Below LOQ	Below LOQ	0.18	Below LOQ	14	13	140	2.1	2.1	2.1	29	20	Below LOQ	Below LOQ	5	4.7	4.5	0.19
		PP	21.9	0.2	0.06	7.34	9	Below MDL	710	Below LOQ	Below LOQ	Below MDL	11	7.4	150	2.8	1.8	1.2	46	30	Below LOQ	Below LOQ	2.2	2.2	3.4	Below LOQ
		DS	11.1	0.6	0.31	7.34	9	Below MDL	Below MDL	910	Below LOQ	0.24	6.3	3.5	100	5.6	Below LOQ	Below LOQ	14	11	Below LOQ	Below LOQ	Below LOQ	0.21	Below MDL	Below MDL
		Hot	56.9	0.05	0.02	7.96	30	Below MDL	96	71	Below MDL	Below MDL	28	25	25	4.7	2.3	2	13	11	Below LOQ	Below LOQ	Below MDL	Below MDL	0.49	Below MDL
	5wk	F1	NA	NA	NA	NA	9	9	Below LOQ	Below LOQ	0.26	0.27	14	14	200	5.1	1.2	1.2	24	16	Below LOQ	Below LOQ	4.5	3.9	3.2	0.18
		PP	18.2	0.2	0.09	7.28	9	Below MDL	830	740	Below LOQ	Below LOQ	11	9.6	140	3.5	0.97	0.9	22	15	Below LOQ	Below LOQ	2	2	1.4	Below LOQ
		DS	11.4	0.4	0.24	7.36	9	9	Below MDL	990	0.26	0.26	9.1	7.1	110	4.7	0.8	Below LOQ	14	11	79	90	0.48	0.42	0.77	Below LOQ
		Hot	57.6	0.05	0.01	7.86	39	Below MDL	Below LOQ	Below MDL	0.39	Below LOQ	32	28	130	2.9	3	1.8	16	7.5	Below LOQ	Below LOQ	0.58	Below LOQ	2	Below LOQ
F11	Pre	F1	NA	NA	NA	NA	Below MDL	Below MDL	Below MDL	Below MDL	Below MDL	Below MDL	Below MDL	Below MDL	Below MDL	Below MDL	Below MDL	Below MDL	Below MDL	Below MDL	Below MDL	Below MDL	Below MDL	Below MDL	Below MDL	Below MDL
		PP	20	0.36667	0.17	7.45	Below MDL	Below MDL	830	850	Below LOQ	Below LOQ	0.31	0.29	2.6	5.2	Below LOQ	Below LOQ	6.4	6.8	Below LOQ	Below LOQ	1.1	1.1	Below LOQ	Below LOQ
		DS	21.5	0.8	0.56	7.35	Below MDL	Below MDL	990	830	Below LOQ	Below LOQ	0.96	0.83	3.3	5.9	Below LOQ	Below LOQ	1.3	1.1	Below LOQ	Below LOQ	0.79	0.6	Below LOQ	0.2
		Hot	55.3	0.05	0.01	7.18	37	37	900	880	0.17	0.17	1.2	1.1	Below MDL	Below MDL	Below LOQ	Below LOQ	3.5	3.5	Below LOQ	Below LOQ	0.73	0.73	Below MDL	Below MDL
	2wk	F1	NA	NA	NA	NA	Below MDL	Below MDL	930	990	Below LOQ	Below LOQ	0.94	0.93	Below MDL	Below LOQ	1.2	1.1	4.2	3.6	Below LOQ	94	0.2	Below LOQ	Below MDL	Below MDL
		PP	21	0.3	0.2	7.55	9	Below MDL	930	940	Below LOQ	Below LOQ	0.96	0.93	Below LOQ	Below LOQ	0.79	Below LOQ	42	4.7	82	Below LOQ	0.17	Below LOQ	Below MDL	Below MDL
		DS	20	1	0.7	7.43	9	Below MDL	Below MDL	Below MDL	Below LOQ	Below LOQ	2	1.5	2.3	2.7	Below LOQ	Below LOQ	23	1.7	Below LOQ	Below LOQ	Below LOQ	Below MDL	Below MDL	Below MDL
		Hot	54.2	0.05	0.01	7.21	Below MDL	Below MDL	990	Below MDL	Below LOQ	0.17	0.98	1	Below MDL	23	Below LOQ	Below LOQ	3.4	4.6	Below LOQ	Below LOQ	Below LOQ	Below LOQ	Below MDL	Below MDL
	5wk	F1	NA	NA	NA	NA	Below MDL	Below MDL	Below MDL	Below MDL	Below LOQ	Below LOQ	0.63	0.44	27	4.1	Below LOQ	Below LOQ	57	52	Below LOQ	Below LOQ	0.34	0.31	0.41	Below MDL
		PP	19	0.4	0.37	7.4	9	Below MDL	Below MDL	Below MDL	Below LOQ	0.18	0.5	0.56	22	4.2	Below LOQ	Below LOQ	89	84	73	74	0.26	0.28	0.43	Below LOQ
		DS	12.2	1.4	1.16	7.43	9	Below MDL	Below MDL	Below MDL	0.16	0.21	1.3	1.3	10	5.2	Below LOQ	Below LOQ	17	17	Below LOQ	Below LOQ	Below LOQ	Below LOQ	Below MDL	Below MDL
		Hot	55.4	0.2	0.01	7.18	9	9	Below MDL	Below MDL	0.16	0.17	1.1	0.71	15	2	Below LOQ	Below LOQ	24	22	Below LOQ	Below LOQ	Below LOQ	0.18	Below LOQ	Below MDL
F16	Pre	F1	NA	NA	NA	NA	9	9	940	950	0.24	0.21	3.6	2.1	21	Below MDL	1.5	1.5	78	69	Below LOQ	Below LOQ	Below MDL	Below MDL	2	Below LOQ
		PP	NA	NA	NA	NA	9	9	870	910	0.17	0.22	2.9	3.1	Below MDL	Below LOQ	1.5	1.5	67	67	Below LOQ	Below LOQ	0.62	0.7	0.33	0.3
		DS	22.2	0.05	0.01	7.56	9	9	980	880	0.18	0.18	1.3	1.2	Below MDL	Below MDL	0.85	0.71	56	58	60	60	0.64	0.62	0.3	0.36
		Hot	21.6	0.4	0.31	7.49	9	9	890	960	0.2	0.22	2.2	2.4	4.5	1.6	Below LOQ	Below LOQ	10	11	Below LOQ	Below LOQ	0.54	0.59	Below LOQ	Below LOQ
	2wk	F1	48.9	0.2	0.01	7.48	57	65	740	940	0.22	0.24	11	13	Below MDL	Below MDL	6	7.2	25	27	Below LOQ	Below LOQ	0.59	0.7	Below LOQ	Below LOQ
		PP	20.8	0.3	0.06	7.49	9	9	930	960	0.22	0.22	1.5	0.79	17	Below LOQ	0.88	0.83	60	56	Below LOQ	Below LOQ	Below MDL	Below MDL	1	Below LOQ
		DS	19.9	0.6	0.32	7.58	9	9	Below MDL	Below MDL	0.22	0.27	1.3	1	14	Below LOQ	Below LOQ	Below LOQ	16	15	Below LOQ	Below LOQ	Below MDL	Below MDL	Below MDL	Below MDL
		Hot	53.2	0.2	0.01	7.47	45	31	900	750	0.23	0.25	13	8.7	30	Below LOQ	6.1	5.2	32	22	Below LOQ	9.5	Below MDL	Below MDL	1	Below MDL
	5wk	F1	NA	NA	NA	NA	Below MDL	9	970	930	0.17	0.19	2.9	2	14	Below LOQ	1.9	2	95	88	Below LOQ	Below LOQ	Below MDL	Below MDL	0.97	0.26
		PP	21.1	0.4	0.05	7.48	9	9	Below MDL	Below MDL	0.2	0.2	1.1	0.73	26	Below LOQ	0.72	0.7	96	88	83	80	Below MDL	Below MDL	0.58	0.18
		DS	16.8	1.2	0.77	7.46	9	9	Below MDL	Below MDL	0.2	0.25	0.87	0.76	11	1.7	Below MDL	Below MDL	21	19	Below LOQ	Below LOQ	Below MDL	Below MDL	Below MDL	Below LOQ
		Hot	52.4	0.2	0.04	7.58	53	46	880	860	0.22	0.17	13	8.7	37	1.2	6.7	6.8	37	28	Below LOQ	Below LOQ	Below MDL	Below MDL	1.1	Below MDL
F17	Pre	F1	NA	NA	NA	NA	9	9	860	800	0.18	Below LOQ	2	1.9	9.1	6.2	Below LOQ	Below LOQ	2.8	2.5	Below LOQ	Below LOQ	2.1	2.1	Below LOQ	Below MDL
		PP	21.6	0.6	0.29	7.48	9	9	910	970	0.17	0.18	0.61	0.66	25	6.1	Below LOQ	Below LOQ	2.3	2.4	Below LOQ	Below LOQ	1.5	1.6	Below LOQ	Below LOQ
		DS	21.8	1.4	1.13	7.42	9	9	Below MDL	Below MDL	0.17	Below LOQ	0.55	0.55	2.1	1.6	Below LOQ	Below LOQ	2.5	2.5	Below LOQ	Below LOQ	0.8	0.75	Below MDL	Below MDL
		Hot	48.2	0.1	0.03	7.36	30	30	920	880	Below LOQ	0.16	2.1	2	2.2	1.9	1.4	1.4	2.3	2.4	Below LOQ	Below LOQ	0.73	0.7	Below MDL	Below MDL
	2wk	F1	NA	NA	NA	NA	Below MDL	Below MDL	Below MDL	910	0.19	0.19	3.1	3.2	Below MDL	2	Below LOQ	Below LOQ	1.2	3.4	Below LOQ	Below LOQ	0.8	1.9	Below MDL	Below MDL
		PP	18.1	0.5	0.4	7.43	9	9	Below MDL	Below MDL	0.19	0.19	0.9	0.83	3.3	8.6	Below LOQ	Below LOQ	8.2	7.4	Below LOQ	Below LOQ	1.1	1.1	Below MDL	Below LOQ
		DS	18.4	1.9	1.46	7.41	9	9	Below MDL	Below MDL	0.2	0.17	0.26	0.2	Below LOQ	Below MDL	Below LOQ	Below LOQ	11	7.3	Below LOQ	Below LOQ	0.31	0.22	Below MDL	Below MDL
		Hot	49.1	0.3	0.01	7.27	Below MDL	9	890	Below MDL	0.17	0.21	1.8	2	Below MDL	Below MDL	1.3	1.2	4.9	1	Below LOQ	Below LOQ	Below LOQ	0.15	Below MDL	Below MDL
	5wk	F1	NA	NA	NA	NA	39	Below MDL	Below MDL	970	0.22	0.21	3.3	0.72	420	1.9	Below LOQ	Below LOQ	16	6.7	Below LOQ	Below LOQ	2.1	1.7	3.1	Below MDL
		PP	19.9	0.8	0.56	7.49	37	9	Below MDL	Below MDL	0.21	0.27	2.3	0.43	350	2.8	Below LOQ	Below LOQ	13	6.7	Below LOQ	Below LOQ	1.4	1.2	3.1	Below MDL
		DS	15.7	2.3	1.55	7.46	Below MDL	9	Below MDL	Below MDL	0.19	0.17	0.4	0.15	75	1.1	Below LOQ	Below LOQ	7.8	5.7	Below LOQ	Below LOQ	0.24	0.25	1.2	Below MDL
		Hot	46.1	0.4	0.15	7.25	620	35	Below MDL	Below MDL	0.2	0.18	12	0.9	370	Below LOQ	1.7	1.3	31	4.6	Below LOQ	Below LOQ	0.33	Below LOQ	16	Below MDL
F18	Pre	F1	NA	NA	NA	NA	9	9	Below MDL	Below MDL	0.23	0.2	1	0.94	3.2	1.2	Below LOQ	Below LOQ	1.7	1.7	Below LOQ	Below LOQ	1.3	1.4	2.3	Below LOQ
		PP	19.8	1.1	0.83	7.32	9	9	990	Below MDL	0.17	0.26	0.47	0.59	Below LOQ	1	Below LOQ	Below LOQ	1.3	1.5	97	Below LOQ	1	1	Below LOQ	Below LOQ
		DS	20.3	1.43333	1.05	7.38	9	9	Below MDL	Below MDL	0.26	0.17	0.55	0.44	2.1	1.8	0.78	Below LOQ	0.85	0.73	Below LOQ	Below LOQ	0.69	0.67	0.17	Below LOQ
		Hot	55.6	0.2	0.1	7.14	Below MDL	31	830	840	0.25	0.24	0.48	0.43	Below MDL	Below MDL	1.2	1.2	0.95	0.81	Below LOQ	Below LOQ	0.7	0.69	Below MDL	Below LOQ
	2wk	F1	NA	NA	NA	NA	Below MDL	9	Below MDL	Below MDL	0.19	0.18	3.9	0.42	200	3.9	Below LOQ	Below LOQ	11	5.5	Below LOQ	Below LOQ	1.5	1.3	1.6	Below MDL
		PP	18.1	1.1	0.87	7.31	Below MDL	9	Below MDL	Below MDL	0.21	Below LOQ	2.9	0.37	120	5.1	Below LOQ	Below LOQ	12	7.6	Below LOQ	Below LOQ	1.1	0.99	0.85	Below MDL
		DS	17.5	1.4	1.26	7.35	73	9	Below MDL	Below MDL	0.2	0.2	0.83	0.36	23	5	Below LOQ	Below LOQ	3.6	3.4	Below LOQ	Below LOQ	0.62	0.65	Below LOQ	Below MDL
		Hot	52.4	0.1	0.01	7.18	Below MDL	9	810	680	0.18	0.17	5.2	1.5	46	2.4	1.3	1	4	1.8	Below LOQ	Below LOQ	0.65	0.54	0.51	Below MDL
	5wk	F1	NA	NA	NA	NA	Below MDL	Below MDL	970	Below MDL	Below LOQ	0.17	0.44	0.44	1.6	1.2	Below LOQ	Below LOQ	0.72	0.68	98	63	Below LOQ	Below LOQ	Below MDL	Below MDL
		PP	15.8	1.5	1.09	7.2	Below MDL	9	Below MDL	Below MDL	0.19	Below LOQ	0.35	0.31	2.1	1.1	Below LOQ	Below LOQ	0.73	0.73	Below LOQ	Below LOQ	0.33	0.24	Below MDL	Below MDL
		DS	14.1	1.6	1.37	7.38	Below MDL	Below MDL	Below MDL	Below MDL	0.19	0.19	0.26	0.23	Below LOQ	1.2	Below MDL	Below MDL	0.48	0.46	7	9.3	Below MDL	Below MDL	Below MDL	Below MDL
		Hot	53.3	0.3	0.07	7.41	Below MDL	Below MDL	740	720	0.18	0.18	0.31	0.36	Below MDL	Below MDL	Below LOQ	Below LOQ	Below LOQ	Below LOQ	Below LOQ	Below LOQ	Below MDL	Below MDL	Below MDL	Below MDL
F19	Pre	F1	NA	NA	NA	NA	Below MDL	Below MDL	900	850	0.23	0.17	2.2	2.2	3.3	3.3	3.7	3.5	6.6	6.5	Below LOQ	Below LOQ	0.52	0.6	Below LOQ	Below LOQ
		PP	23.9	0.2	0.16	7.59	47	55	900	830	0.17	0.17	4.5	4.5	2.6	18	15	15	4.3	4.6	Below LOQ	Below LOQ	0.59	0.52	Below MDL	0.18
		DS	20.5	0.05	0.03	7.57	9	9	800	840	0.17	Below LOQ	3.1	3.2	2.5	3.7	Below MDL	Below MDL	2	2	Below LOQ	Below LOQ	0.53	0.61	Below MDL	Below MDL
		Hot	55.5	0.05	0.01	7.39	53	49	890	880	0.19	0.19	4.9	4.7	1.6	1.4	3.1	2.9	2.2	2.2	Below LOQ	Below LOQ	0.52	0.54	Below MDL	Below MDL
	2wk	F1	NA	NA	NA	NA	Below MDL	Below MDL	930	940	0.21	0.19	0.92	0.83	Below MDL	Below MDL	3.9	4.4	2.6	2.2	Below LOQ	Below LOQ	Below MDL	Below MDL	Below MDL	Below MDL
		PP	21.6	0.2	0.04	7.49	Below MDL	Below MDL	880	940	0.18	0.21	0.65	0.72	Below MDL	Below MDL	12	12	1.9	2.1	Below LOQ	Below LOQ	Below MDL	Below MDL	Below MDL	Below MDL
		DS	20	0.1	0.07	7.57	Below MDL	Below MDL	890	800	Below LOQ	0.18	1.8	2.3	Below LOQ	Below MDL	0.76	1	1.6	1.3	Below LOQ	Below MDL	Below MDL	Below MDL	Below MDL	Below MDL
		Hot	55.9	0.05	0.02	7.23	9	Below MDL	850	800	0.2	Below LOQ	2.6	1.4	Below MDL	Below LOQ	1.6	Below LOQ	1.3	7	Below LOQ	Below LOQ	Below MDL	Below MDL	Below MDL	Below MDL
	5wk	F1	NA	NA	NA	NA	Below MDL	9	810	810	0.17	0.24	3.9	3.7	6.9	Below MDL	23	22	39	35	61	Below LOQ	Below MDL	Below MDL	0.24	Below MDL
		PP	21	0.7	0.42	7.4	9	9	Below MDL	970	0.2	0.26	0.9	0.55	17	Below LOQ	1.3	1.3	30	26	Below LOQ	Below LOQ	Below MDL	Below MDL	0.48	Below MDL
		DS	18	0.7	0.39	7.57	9	9	Below MDL	910	0.2	0.2	1.3	0.98	19	Below LOQ	Below MDL	Below MDL	19	16	Below MDL	Below LOQ	0.16	Below MDL	Below MDL	Below MDL
		Hot	57	0.2	0.01	7.3	Below MDL	9	890	800	0.2	0.19	1.9	1.5	2.9	Below MDL	1.8	1.8	11	9.5	Below MDL	Below LOQ	Below MDL	Below MDL	Below MDL	Below MDL
F20	Pre	F1	NA	NA	NA	NA	9	9	Below LOQ	780	Below LOQ	Below LOQ	6.6	6.9	1.8	3	0.82	1	4.3	4.7	Below LOQ	Below LOQ	0.69	0.81	Below MDL	Below MDL
		PP	21.3	0.2	0.01	7.38	9	9	890	800	Below LOQ	Below LOQ	4.9	5	1.7	3.1	Below LOQ	Below LOQ	5	6	74	77	0.75	0.64	Below MDL	Below LOQ
		DS	21.1	0.5	0.39	7.47	9	9	940	930	0.16	0.18	2.7	2.7	1.8	5.1	Below LOQ	Below LOQ	2.4	2.4	Below LOQ	Below LOQ	0.58	0.57	Below MDL	Below MDL
		Hot	48.6	0.05	0.01	8.08	71	70	Below LOQ	Below LOQ	Below LOQ	Below LOQ	3.7	3.6	Below MDL	Below LOQ	2.3	2.5	5.7	5.8	6.8	7.1	0.52	0.56	Below MDL	Below MDL
	2wk	F1	NA	NA	NA	NA	9	9	870	810	0.18	0.17	4.6	4.2	4.2	1.3	0.84	0.86	9.3	8.4	Below LOQ	Below LOQ	0.23	0.19	Below MDL	Below MDL
		PP	21.7	0.5	0.17	7.48	9	9	940	Below MDL	0.26	0.24	2.3	2.4	Below LOQ	2.6	Below LOQ	Below LOQ	10	11	74	77	Below LOQ	Below LOQ	Below MDL	Below MDL
		DS	18.8	0.5	0.34	7.51	9	9	Below MDL	Below MDL	0.25	0.25	1.6	1.7	1.5	3.1	Below MDL	Below MDL	6.3	6.2	Below LOQ	Below LOQ	Below MDL	Below MDL	Below MDL	Below MDL
		Hot	51.1	0.2	0.02	7.77	75	81	750	730	0.23	0.25	7	7.3	Below MDL	Below MDL	3	2.9	7.9	8	Below LOQ	Below LOQ	Below MDL	Below MDL	Below MDL	Below MDL
	5wk	F1	NA	NA	NA	NA	9	Below MDL	870	830	0.16	Below LOQ	3.6	3.4	2.9	Below LOQ	0.82	Below LOQ	13	1	Below LOQ	Below LOQ	0.26	Below MDL	Below MDL	Below MDL
		PP	19.8	0.3	0.04	7.39	9	9	890	920	0.18	0.16	2.3	2.3	2	1.3	Below LOQ	Below LOQ	3.6	6.1	97	76	Below LOQ	Below LOQ	Below MDL	Below MDL
		DS	15.9	0.633333	0.42	7.53	9	Below MDL	870	940	0.2	0.16	1.9	2	5.5	3	Below LOQ	Below LOQ	4.7	1.8	Below LOQ	Below LOQ	Below MDL	Below MDL	Below MDL	Below MDL
		Hot	53.4	0.133333	0.01	7.53	44	9	740	Below LOQ	0.19	0.21	5.3	5.1	Below MDL	Below MDL	3.2	2.2	7.4	0.67	Below LOQ	8.6	Below MDL	Below MDL	Below MDL	Below MDL
F21	Pre	F1	NA	NA	NA	NA	Below MDL	9	Below MDL	940	0.28	0.19	0.35	0.28	Below MDL	Below MDL	0.88	0.75	5.3	15	71	76	Below MDL	Below MDL	Below MDL	Below LOQ
		PP	20.6	0.8	0.51	7.4	9	Below MDL	Below MDL	Below MDL	0.17	0.24	0.23	0.22	Below LOQ	Below MDL	0.8	Below LOQ	33	3.3	Below LOQ	Below LOQ	Below MDL	Below MDL	0.41	Below MDL
		DS	20.5	0.533333	0.31	7.42	Below MDL	9	Below MDL	950	0.22	0.21	2.2	2.6	Below LOQ	Below LOQ	Below MDL	Below MDL	0.84	5.3	Below MDL	Below LOQ	Below MDL	Below MDL	Below MDL	Below MDL
		Hot	52.2	0.2	0.01	7.28	Below MDL	Below MDL	990	Below MDL	0.25	0.23	0.4	0.48	Below MDL	Below MDL	Below MDL	Below LOQ	16	3.1	Below LOQ	Below LOQ	Below MDL	Below MDL	Below MDL	Below MDL
	2wk	F1	NA	NA	NA	NA	36	9	Below MDL	940	0.26	0.19	5.7	1.3	300	Below LOQ	Below LOQ	Below LOQ	150	65	99	70	Below MDL	Below MDL	9.5	Below MDL
		PP	20.2	0.5	0.28	7.5	37	9	Below MDL	Below MDL	0.24	0.16	3.3	0.5	150	1.2	Below LOQ	Below LOQ	78	42	Below LOQ	Below LOQ	Below MDL	Below MDL	5.9	Below LOQ
		DS	18.5	1	0.61	7.48	9	9	Below MDL	Below MDL	0.25	0.27	1.2	1.1	34	2.3	Below LOQ	Below LOQ	9.3	8.3	Below LOQ	Below LOQ	Below MDL	Below MDL	Below MDL	Below MDL
		Hot	51.4	0.2	0.01	7.33	Below MDL	Below MDL	990	960	0.19	0.2	2.7	1.4	96	1.3	Below LOQ	Below LOQ	27	15	7.3	Below LOQ	Below MDL	Below MDL	0.99	Below MDL
	5wk	F1	NA	NA	NA	NA	9	9	950	920	0.18	0.19	0.69	0.62	Below MDL	Below MDL	Below LOQ	Below LOQ	7.7	76	Below LOQ	Below LOQ	Below MDL	Below MDL	Below MDL	Below MDL
		PP	20	0.5	0.25	7.4	9	Below MDL	Below MDL	Below MDL	Below LOQ	0.19	0.38	0.39	1.7	Below MDL	Below LOQ	1.3	61	2.5	Below LOQ	Below LOQ	Below MDL	Below MDL	Below LOQ	Below MDL
		DS	15.6	0.933333	0.64	7.47	9	Below MDL	960	Below MDL	0.16	Below LOQ	0.71	1.9	2.4	1.7	Below LOQ	Below LOQ	7.1	0.75	Below LOQ	Below LOQ	Below MDL	Below MDL	Below MDL	Below MDL
		Hot	54	0.2	0.01	7.24	Below MDL	9	Below MDL	Below MDL	0.2	0.19	0.19	0.17	1.1	Below MDL	Below LOQ	Below MDL	17	1.1	Below LOQ	Below MDL	Below MDL	Below MDL	Below MDL	Below MDL
F22	Pre	F1	NA	NA	NA	NA	Below MDL	9	Below MDL	Below MDL	Below LOQ	0.17	Below LOQ	0.15	Below LOQ	Below LOQ	Below LOQ	Below LOQ	Below MDL	6.2	79	Below LOQ	0.17	0.55	Below MDL	0.18
		PP	20.5	1.2	0.95	7.35	9	9	Below MDL	Below MDL	Below LOQ	Below LOQ	Below MDL	Below MDL	Below MDL	Below LOQ	Below LOQ	Below LOQ	4.1	4.1	76	76	0.38	0.4	Below LOQ	Below LOQ
		DS	13.4	1.9	1.54	7.36	9	Below MDL	Below MDL	Below MDL	Below LOQ	0.17	Below LOQ	Below LOQ	4.8	Below MDL	Below MDL	Below MDL	0.47	Below MDL	Below LOQ	Below LOQ	Below LOQ	Below LOQ	Below MDL	Below MDL
		Hot	49.2	0.4	0.22	7.17	9	Below MDL	770	770	0.19	Below LOQ	Below MDL	Below MDL	2.8	Below MDL	0.78	0.73	0.73	Below MDL	Below LOQ	Below LOQ	Below LOQ	Below LOQ	Below MDL	Below MDL
	2wk	F1	NA	NA	NA	NA	Below MDL	9	940	Below MDL	Below LOQ	0.16	Below LOQ	0.15	6.3	Below LOQ	Below LOQ	Below LOQ	14	16	Below LOQ	Below LOQ	0.4	0.43	0.74	0.29
		PP	17.8	1.5	1.1	7.37	Below MDL	9	Below MDL	Below MDL	Below LOQ	0.17	Below LOQ	Below LOQ	4.1	Below LOQ	Below LOQ	Below LOQ	35	39	62	71	0.22	0.23	0.55	0.28
		DS	11.5	2	1.9	7.5	Below MDL	9	Below MDL	Below MDL	0.16	Below LOQ	0.2	0.18	2.3	Below MDL	Below LOQ	Below LOQ	17	17	9.8	Below LOQ	Below MDL	Below MDL	Below MDL	Below MDL
		Hot	48.2	0.5	0.25	7.31	Below MDL	9	840	730	0.18	0.19	0.45	0.14	3.7	Below MDL	Below LOQ	Below LOQ	16	7.3	Below LOQ	Below LOQ	Below LOQ	Below LOQ	0.36	Below MDL
	5wk	F1	NA	NA	NA	NA	Below MDL	9	Below MDL	Below MDL	0.21	0.22	0.18	Below LOQ	13	2.7	Below LOQ	Below LOQ	21	19	Below LOQ	Below LOQ	0.51	0.43	1.2	0.47
		PP	20.2	1.26667	1.01	6.92	Below MDL	9	Below MDL	Below MDL	0.19	0.22	0.19	Below LOQ	9.2	3.2	Below MDL	Below MDL	32	31	72	74	0.28	0.3	0.89	0.54
		DS	8	2	1.57	7.31	Below MDL	9	Below MDL	Below MDL	0.17	0.19	0.29	0.23	4.7	2.2	Below MDL	Below MDL	9.1	9.3	Below LOQ	Below LOQ	Below MDL	Below MDL	Below LOQ	Below MDL
		Hot	45.8	0.3	0.12	7.21	600	36	Below MDL	860	0.22	Below LOQ	0.98	Below LOQ	12	Below MDL	0.77	Below LOQ	26	8.5	Below LOQ	Below LOQ	Below LOQ	Below LOQ	0.65	Below MDL
Temp, temperature; Pre, pre-service line replacement; 2wk, two weeks post-service line replacement; 5wk, five weeks post-service line replacement; NA, not analyzed; Below MDL, below the minimum detection limit; Below LOQ, above the minimum detection limit but below the limit of quantification.
